# Supplementary material for: The Polymorphism in ADORA3 Decreases Transcriptional Activity and Influences the Chronic Heart Failure Risk in the Chinese
Source: Hindawi journal article supplement (doi:10.1155/2018/4969385), 2018-05-31
Supplement: f1 [file 4969385.f1.pdf]

# **The polymorphism in *ADORA3* decreases transcriptional activity and influences the chronic heart failure risk in Chinese**

Hai-Rong He (M.M.)<sup>1,a</sup>, Yuan-Jie Li (M.D.; Ph.D.)<sup>2,a</sup>, Gong-Hao He (M.D.; Ph.D.)<sup>3</sup>, Hua Qiang (Ph.D.)<sup>4</sup>, Ya-Jing Zhai (B.S.)<sup>5</sup>, Mao Ma (Ph.D.)<sup>6</sup>, Ya-Jun Wang (B.S.)<sup>6</sup>, Jun Lyu (M.D.; Ph.D.)<sup>1,\*</sup>

<sup>1</sup>*Clinical Research Center, The First Affiliated Hospital of Xi'an Jiaotong University, Xi'an, 710061, China*

<sup>2</sup>*Department of Human Anatomy, Histology and Embryology, Medical College, Xi'an Jiaotong University, Xi'an, 710061, China.*

<sup>3</sup>*Department of Pharmacy, Kunming General Hospital of Chengdu Military Region, Kunming 650032, China.*

<sup>4</sup>*Department of Cardiovascular Medicine, The First Affiliated Hospital of Xi'an Jiaotong University, Xi'an, 710061, China.*

<sup>5</sup>*Department of Pharmacy, The First Affiliated Hospital of Xi'an Jiaotong University, Xi'an, 710061, China.*

<sup>6</sup>*Physical Examination Department, The First Affiliated Hospital of Xi'an Jiaotong University, Xi'an, 710061, China*

## **List of Supplementary Material for the article**

1. Supplementary Table S1: Primers used for SNP genotyping.
2. Supplementary Table S2: Primer lists of real-time PCR.
3. Supplementary Table S3: Genotype distribution of the rs1415792, rs3393 and rs35511654 and their associations with the risk of chronic heart failure under different contrast models.
4. Supplementary Table S4: Logistic regression analysis for rs1415792, rs3393 and rs35511654 under a dominant, recessive, and additive genetic model adjusted for age, sex, and cardiovascular risk factors.

**Supplementary Table S1.** Primers used for SNP genotyping.

| SNP_ID     | Allele | 1st-PCR                         | 2nd-PCR                         | UEP_SEQ                 |
|------------|--------|---------------------------------|---------------------------------|-------------------------|
| rs1415792  | T/C    | ACGTTGGATGGCAGGTTCTCTGCTCAATTC  | ACGTTGGATGGACTTACTGACAAAAGGCTC  | TGGTGGTGACTCATTTCAT     |
| rs1544223  | G/A    | ACGTTGGATGAGAGGACAGTGCAGGATCAG  | ACGTTGGATGTTTGCTAAGCTGGCAGAAAG  | gaTGGCAGAAAGATTGCATA    |
| rs3393     | G/A    | ACGTTGGATGGTGAATTGAGCAGAGAACC   | ACGTTGGATGTTTCAGCAGTTTAAGTCCCCC | TTCTGTTCCCAACATCT       |
| rs35511654 | T/G    | ACGTTGGATGAGCACAAAGCTGTGGTACCTC | ACGTTGGATGTGTTTGCTCTGTCATGGCTG  | ctcttTCATGGCTGCCTTTATCT |

**Supplementary Table S2.** Primer lists of real-time PCR.

| Gene           | Forward primer (5'→3') | Reverse primer (5'→3' ) | Product size (bp) |
|----------------|------------------------|-------------------------|-------------------|
| <i>ADORA3</i>  | AGCAAAGCGTCAACTCGTG    | ATAAGGAGGCAAACGGGAGA    | 112               |
| $\beta$ -actin | TGACGTGGACATCCGCAAAG   | CTGGAAGGTGGACAGCGAGG    | 205               |

**Supplementary Table S3.** Genotype distribution of the rs1415792, rs3393 and rs35511654 and their associations with the risk of chronic heart failure under different contrast models.

| Population | Genotype   | CHF<br>n (%) | Controls<br>n (%) | HWE<br><i>P</i> <sup>a</sup> | Dominant model<br><i>P</i> <sup>a</sup> | Recessive model<br><i>P</i> <sup>a</sup> | Additive model<br><i>P</i> <sup>a</sup> | Allele contrast<br><i>P</i> <sup>a</sup> |
|------------|------------|--------------|-------------------|------------------------------|-----------------------------------------|------------------------------------------|-----------------------------------------|------------------------------------------|
| Xi' an     | rs1415792  |              |                   |                              |                                         |                                          |                                         |                                          |
|            | TT (W)     | 18 (6)       | 14 (3.5)          | 0.043                        | 0.117                                   | 0.691                                    | 0.207                                   | 0.826                                    |
|            | CT         | 105 (35)     | 156 (39)          |                              |                                         |                                          |                                         |                                          |
|            | CC         | 177 (59)     | 230 (57.5)        |                              |                                         |                                          |                                         |                                          |
|            | rs3393     |              |                   |                              |                                         |                                          |                                         |                                          |
|            | GG (W)     | 97 (32.33)   | 146 (36.68)       | 0.063                        | 0.232                                   | 0.996                                    | 0.440                                   | 0.416                                    |
|            | GA         | 145 (48.33)  | 175 (43.97)       |                              |                                         |                                          |                                         |                                          |
|            | AA         | 58 (19.33)   | 77 (19.35)        |                              |                                         |                                          |                                         |                                          |
|            | rs35511654 |              |                   |                              |                                         |                                          |                                         |                                          |
|            | TT (W)     | 298 (99.33)  | 398 (99.5)        | 0.96                         | 0.828 <sup>b</sup>                      | NA                                       | NA                                      | 0.828                                    |
|            | GT         | 2 (0.67)     | 2 (0.5)           |                              |                                         |                                          |                                         |                                          |
|            | GG         | 0 (0)        | 0 (0)             |                              |                                         |                                          |                                         |                                          |
| Kunming    | rs1415792  |              |                   |                              |                                         |                                          |                                         |                                          |
|            | TT (W)     | 15 (4.98)    | 28 (7)            | 0.313                        | 0.271                                   | 0.526                                    | 0.519                                   | 0.338                                    |
|            | CT         | 105 (34.88)  | 141 (35.25)       |                              |                                         |                                          |                                         |                                          |
|            | CC         | 181 (60.13)  | 231 (57.75)       |                              |                                         |                                          |                                         |                                          |
|            | rs3393     |              |                   |                              |                                         |                                          |                                         |                                          |
|            | GG (W)     | 78 (25.74)   | 130 (32.42)       | 0.076                        | 0.055                                   | 0.301                                    | 0.147                                   | 0.063                                    |
|            | GA         | 150 (49.5)   | 185 (46.13)       |                              |                                         |                                          |                                         |                                          |
|            | AA         | 75 (24.75)   | 86 (21.45)        |                              |                                         |                                          |                                         |                                          |
|            | rs35511654 |              |                   |                              |                                         |                                          |                                         |                                          |
|            | TT (W)     | 302 (99.67)  | 400 (99.75)       | NA                           | 0.606 <sup>b</sup>                      | NA                                       | NA                                      | 0.606                                    |
|            | GT         | 1 (0.33)     | 1 (0.25)          |                              |                                         |                                          |                                         |                                          |
|            | GG         | 0 (0)        | 0 (0)             |                              |                                         |                                          |                                         |                                          |

Abbreviations: CHF, chronic heart failure; HWE, Hardy-Weinberg equilibrium; NA, not available.

<sup>a</sup> *P* values was calculated from two-sided  $\chi^2$ -test.

<sup>b</sup> *P* values was calculated from two-sided continuity-adjusted  $\chi^2$ -test.

**Supplementary Table S4.** Logistic regression analysis for rs1415792, rs3393 and rs35511654 under a dominant, recessive, and additive genetic model adjusted for age, sex, and cardiovascular risk factors.

| SNPs       | Contrast models | Xi'an                |                       | Kunming              |                       |
|------------|-----------------|----------------------|-----------------------|----------------------|-----------------------|
|            |                 | Odds ratio (95% CI)  | <i>P</i> <sup>a</sup> | Odds ratio (95% CI)  | <i>P</i> <sup>a</sup> |
| rs1415792  | Dominant model  | 0.488 (0.227-1.050)  | 0.067                 | 1.157 (0.587-2.281)  | 0.674                 |
|            | Recessive model | 0.931 (0.671-1.290)  | 0.666                 | 0.997 (0.720-1.381)  | 0.987                 |
|            | Additive model  | 0.865 (0.656-1.140)  | 0.303                 | 1.021 (0.784-1.329)  | 0.879                 |
|            | Allele contrast | 0.872 (0.667-1.140)  | 0.317                 | 1.021 (1.782-1.333)  | 0.877                 |
| rs3393     | Dominant model  | 1.201 (0.854-1.688)  | 0.292                 | 1.259 (0.883-1.794)  | 0.203                 |
|            | Recessive model | 1.091 (0.728-1.636)  | 0.674                 | 1.120 (0.767-1.637)  | 0.556                 |
|            | Additive model  | 1.112 (0.889-1.390)  | 0.354                 | 1.138 (0.912-1.421)  | 0.252                 |
|            | Allele contrast | 1.118 (0.889-1.405)  | 0.342                 | 1.144 (0.913-1.435)  | 0.242                 |
| rs35511654 | Dominant model  | 1.531 (0.205-11.465) | 0.678                 | 1.364 (0.078-23.869) | 0.832                 |
|            | Recessive model | NA                   | NA                    | NA                   | NA                    |
|            | Additive model  | NA                   | NA                    | NA                   | NA                    |
|            | Allele contrast | 1.526 (0.205-11.336) | 0.680                 | 1.361 (0.078-23.628) | 0.832                 |

Abbreviations: CI, confidence interval; NA, not available.

<sup>a</sup>Adjusted for age, sex, and cardiovascular risk factors(hypertension, dyslipidemia, diabetes and smoking habit).
